# Supplementary material
Source: Frontiers journal article supplement (https://www.frontiersin.org/articles/498996)
Supplement: Table_1.XLSX [file Table_1.XLSX]

## Sheet: Timeline PGM
Year	Event	Description	Comments
1976	First agricultural research activities, PRO-TERRA project, then PRO-PASTO with support from BASA	Embrapa selects Paragominas as an experimental area with producers. Under the coordination of Dr. Jonas Veiga, later Dr. Simão Neto Dias Filho, reserach was held on varieties of pastures, later overmanaged, over fertilization. Research evolved overtime to include carbon sequestration, silvopastoral, integration of livestock farming, animal welfare, fertilizer tests with various cultivars and type…	Since that time Embrapa has been permanently present, initially through contact with producers, until building its experimental field. It was the cornerstone of all other research partnerships in the region.
1987	First INCRA settlement created	PA Colonias Reunidas with just over 4000 hectares.
1991	First plantations of paricá	Beginning of planting and first harvest in 1998
1992	Beginning of forestry research activities in the municipality	Beginning of a series of research projects related to forest management, forest degradation, among others, through researcher Christophuer Uhl, initially cooperating with Embrapa.	It led to the creation of NGOs such as Imazon and IPAM. Several of their current researchers have graduated in Masters and PhDs in Paragominas, supported by USAID and WWF.
1996	Homologation of Upper Rio Guamá IT	Demarcated in 1946, and homologated in 1996, with about 279 thousand hectares, of which 34% (97 thousand hectares) in the municipality of Paragominas.	Currently there are about 3000 Tupi-Guarani indigenous from three groups: Guajá, Ka'apor and Tembé They are divided in two groups of villages: 16 villages in the upper Guamá (municipality of Santa Luzia), another 16 villages on the Gurupi river, municipality of Paragominas. There are illegal occupations by garimpeiros and family farmers, but none of the cases happen in the municipality of Paragoi…
1996	Vale begins its investment in mining	Vale's initial investments to develop bauxite extraction. Construction of a 180km pipeline to the port of Barcarena.	Production begins in 2002 and in 2007 the main mining site starts to be extracted.
1996	Second INCRA settlement created	PA Camapuan with about 13 thousand hectares
1997	First soybean plantations	First experiments led by a group of producers with Embrapa's support
1998	New INCRA Settlement created, known as CAIP.	PA Paragonorte with over 30 thousand hectares and 1000 families.	It becomes one of the largest settlements in the Amazon at that time.
1999	Creation of the Municipal Environment Fund (FOMAM)	Through Law 236/99. The objective of FOMAM is to finance plans, programs, projects, research, technologies and actions aimed at the rational and sustainable use of natural resources, as well as the implementation of actions aimed at the control, inspection, defense and recovery of the environment, in accordance with the guidelines of the Environmental Policy.	Currently, FOMAM is strategic to finance actions related to the environment. It has already been used to improve SEMMA's operations, with the acquisition of vehicles, computers, GPS, among others, in addition to financing operations to target illegal timber extraction. It also has a history of financing actions focused on cleaning up the Uraim River in partnership with Lions clubs, among others. …
2000	Large-scale soybean production begins	From 2000 onwards the system in test is validated and begins to be adopted in a large scale.	It has spurred a new wave of migrants and given rise to a new regional economic cycle.
2003	New INCRA settlement created	PA Rio das Cruzes with about 4000 hectares and 66 families
2004	Paragominas wins for the first time the Efficient School Meal Manager Award	Award given by the NGO Ação Fome Zero, which disseminates good practices in municipal public management of the National School Feeding Program (PNAE).	It was created in 2004 and Paragominas will win the prize every year.
2004	Adnan Demachki wins mayor election for the first time	Vice-mayor in the previous management, Demachki wins against Paulo Tocantins.	It takes office in early 2005.
2005	Two more INCRA Settlement created	PA Mandacaru and PA Alta Floresta with just over 4000 hectares and 100 families each
2005	Begining of municipal environmental management	Environmental Department of the Secretariat of Urbanism	In the first administration of Mayor Adnam Demachki
2005	Curupira and Ouro Verde Operations	IBAMA operations in the framework of the first PPCDAM	It led to the closure of some sawmills
2006	Creation of the Uraim Environmental Preservation Area	The entire Uraim basin is included, from the spring to the river Gurupi.	Law 598/2006 - creates the protection area - APA DO RIO URAIM, regulating the use and occupation of the soil at its margins and the execution of activities by the public and private sector.
2006	Soy Moratorium signed	As a result of the Greenpeace campaign in Santarem, several traders sign the Soy Moratorium which commits to buying soybeans in deforested areas until 2006.	Paragominas already had 5000 ha of soybean planted at that time and has been monitored by the GTS since the beginning.
2006	Four more and last INCRA settlements created	PA Areia Branca, PA Luiz Inácio, PA Nova Vida and PA Glebinha.	The PA Luiz Inácio is the largest with about 34 thousand hectares and more than 500 families, even bigger than the CAIP.
2007	Inauguration of the furniture complex	It emerged as a result of the activities of the project PROMOS developed by SEBRAE
2007	Extension of the Mineral Bauxite Extraction Program in Paragominas	Called "Jázida Miltônia 3", the extraction increases up to 11 million tons of bauxite per year.	Later the management was transferred to Hydro. Since 2007, an average of R$ 11 million per year has been injected into this municipality through the transfer of the Financial Compensation for Mineral Exploration (CFEM).
2007	Established the municipal environmental system	The Secretariat of Environment and Urbanism (Semma), created by Condema and the Municipal Fund that had already been created in 1999.	First habilitation for environmental licensing.
2007	EMBRAPA starts the Good Agricultural Practices Program in Paragominas	20 properties are selected to join the program
2008	Publication by the MMA of the list of 36 major deforesting municipalities, prioritizing federal actions.	Paragominas is part of the list, which later involves up to 43 municipalities in the Amazon.	Published in January
2008	Operation Arc of Fire	Supervision of logging activity. This resulted in the closure of 14 sawmills, seizure of 8,000 m3 of timber, and 20 million in fines.	It took place in February
2008	Municipal government negotiation with MMA on conditions for leaving the list	Meeting in Brasilia between the mayor of Paragominas and Carlos Minc, decision to replace CCIR requirement with CAR requirement.	It took place in February
2008	Pact Paragominas Município Verde and launch of the Município Verde Project	The Pacto Paragominas Município Verde (Green Municipality Pact) is announced and signed, and the Projeto Município Verde (Green Municipality Project) is launched, to put an end to deforestation, bringing together the municipal government, the soybean producers' association, the medium-largeholders Union, the Timber Union (SRPR) and aggregating a total of 51 representative entities, including trad…	Also in February.
2008	Term of Cooperation for a plan to combat deforestation (March)	Cooperation Agreement between the municipal government, Sema-PA, Imazon and The Nature Conservancy (TNC) signed	In March
2008	Start of CAR mapping, SAD alert system and field operations.	Beginning of CAR mapping activities in Paragominas by TNC. Imazon conducts CAR in family farming areas, which are not under INCRA jurisdiction. Socio-economic diagnosis and monthly monitoring of deforestation by IMAZON, and connection with the municipal SEMAS, which develops inspection and awareness actions. The Producers' Union publishes Good Agricultural Practices.
2008	Union continues Embrapa's Good Agricultural Practices Program and launches the Sustainable Livestock Project	In partnership with EMBRAPA and the city hall, the program supports twenty properties to adopt the sustainability stages defined by the Good Agricultural Practices program.
2008	Adnan Demachki wins mayor election for second time	This time it had no adversary, since Evandro Moreira was banned and prevented from participating.	In October
2008	Operation Black Track (Rastro Negro) in Paragominas	Destruction of 200 kilns, seizure of 130 m3 of coal, 400 m3 of wood, fines of 2 million reais. The population erupted and burned the IBAMA building.	In November
2009	Municipal Charcoal Law	City Council passes a law prohibiting the production of charcoal with management residues.
2009	New Cooperation Term (March)	With the same actors. Micro-zoning of rural properties was carried out by TNC, in addition to implementation of good agricultural practices and technical strengthening of Semma.
2009	Embargo of slaughterhouses and retailers of livestock products in the Amazon	On May 1st the MPF embargoes slaughterhouses and retailers as Carrefour for buying cattle of origin linked to deforestation. Executed 20 actions against 34 defaulters and claims of 2 billion reais of indemnization. 69 companies received indication not to buy meat related to deforestation.	Major retailers such as Pão de Açucar, Walmart and Carrefour suspend contracts with refrigerators, which forces the TAC. IFC (International Finance Corporation) cancels a R$90 million contract with Bertin.
2009	Meat TAC signed between the Federal Public Ministry (MPF) and the largest slaughterhouses	The first is signed in June by Bertin. In July the other main slaughterhouses including JBS, Mafrig and Minerva sign the TAC. An agreement is also signed with FAEPA in November.	It implies not buying from areas on IBAMA's embargo list, not being in an area deforested after 2008, having overlapped UC and IT, nor being on the slave labor list. The first step would be to join the CAR.
2009	Paragominas receives qualification for shared environmental management from State SEMAS - HGAC 001/2009	Paragominas receives the delegation of competence to license a wide range of enterprises with local environmental impact activities such as slaughterhouses, slaughterhouses, fish farming, agriculture, livestock and a wide range of activities related to trade, industry and services.	This delegation allowed the beginning of the consolidation of municipal environmental management, with the need to structure and train the Secretariat of the Environment's staff to meet municipal demand. Local environmental licensing was also strategic to leverage the sustainable development of the municipality. The productive sector created a relationship with the public authorities.
2010	Installation of the first mdf factory	Floraplac MDF, of the Concren Group
2010	Exit from the list and move to municipality under monitoring (April)	Paragominas is the first municipality to leave the MMA priority deforestation list; MMA Ordinance no 67/2010.	In April.
2010	National Monetary Council makes exception for credit in Paragominas	National Monetary Council makes an exception for granting credit without land title in the next two harvests, substituting the CCIR by CAR
2010	Municipality signs a term of commitment with MPF, State Government, FAEPA and Ibama.	Each body assumes obligations so that producers have sufficient time and can access production licenses for the following year.	In November
2011	Green Municipalities Program established	Through state decree 54/2011 the Paragominas model is exported to the state of Pará.
2011	ASA Paragominas	The Environmental Services Agency of Paragominas is created.	Apparently of little or no relevance.
2011	Creation of the Environmental Observatory of Paragominas	Through Municipal Decree No. 128 of March 23, 2011. The Environmental Observatory of Paragominas was an interlocutor forum for monitoring and evaluation of programs, projects, actions and indicators of the environmental area of Paragominas, especially the initiatives linked to the Green Municipality Project.	The State Public Prosecutor's Office, the MPF, IBAMA, TNC, IMAZON, Sindicato Rural, COMDEMA, Câmara de Vereadores, SEMAS Estadual, participated in it. It had little effectiveness and never really worked.
2011	Creation of the Municipal Environmental Code	Through Municipal Law 765/2011 the Municipal Forestry Code - CAM is instituted, containing the Policy and the Municipal Environmental System of Paragominas.	The Law follows all the principles of the federal legislation, but considers the specificities of the Municipality of Paragominas. It is a special legislation that does not contradict the federal legislation, but has prevalence over the latter in the municipality.
2011	Green Livestock Project	Beginning of the Green Cattle Project, led by the Union (SPRP) financed by the Vale Fund and the company Dow AgroSciences, in partnership with ESALQ.	It implemented initiatives in 6 farms of the Good Agricultural Practices program and ended in 2014.
2011	Creation of the Greener (Mais Verde) Program	Incentives for Good Environmental Practices in Urban Commercial and Industrial Establishments - IPTU VERDE.	The Municipal Tax Code represented by Complementary Law 001/2017 provides in its art. 20, paragraph 5, item III the possibility of granting a 30% discount on the IPTU for tax incentive programs related to tax education such as: Green IPTU, clean city, standardized sidewalks and protection of the historical heritage of the city, among others.
2012	Municipal law prohibiting the circulation of products from real estate without a CAR	Law 810/2012 now prohibits the use, circulation and marketing of forest, agricultural, mineral and agropastoral products produced in properties that were not registered in the CAR in the municipality.
2012	Paulinho wins mayor election	It wins against Professor Raydson and takes office in early 2013.
2012	Technical Cooperation Agreement for Forest Management (decentralization)	The State Government of Pará delegates forest management, including analysis, approval and management of forest management projects, the issuance of LAR, with technical support from Imazon and TNC.	It followed on from the decentralization of environmental management that began in 2009 with the habilitation granted by the state government to license activities with local impact.
2013	Creation of the Technical Forestry Chamber in Paragominas	The purpose of the Technical Forestry Chamber was to discuss, evaluate, propose and deliberate on studies, guidelines and techniques for the improvement and implementation of the forest policy in Paragominas.	It came into operation in the beginning. The function was to analyze requests for forest management. At the time, they had become mandatory for sawmills to be able to operate (within the framework of the Arc de fogo operation). Then, to ensure transparency in the analysis process, this chamber was created. In time, it stopped working, for two reasons (i) there was less and less demand for process…
2014	Law defining the compensation of legal reserve liabilities of rural properties	Law 864/2014 defines the compensation of reserve liabilities_x000D_ legal of rural properties by renting_x000D_ area under environmental servitude in cases of_x000D_ possession areas.	The objective of this law was to encourage the owners of forests in tenure areas to protect them, obtaining income from environmental servitude. In the Amazon biome, the possessor feels doubly penalized because he has many difficulties to regularize his land with ITERPA (a process can last more than 10 years) and cannot make commercial use of the forest in these areas, because for the sustainable…
2014	Grain Protocol signed	The Grain Protocol was signed in 2014 in Paragominas by the Brazilian Association of Vegetable Oil Industries (ABIOVE) & traders, the MPF, Dom Eliseu & Paragominas Municipal Governments and unions and the state PMV Program. Soybean traders committed to buy only soybean from landholders who have a CAR and are not on the list of properties under embargo nor accused of using slave labor
2015	Drought and fires in Paragominas	An area of 183,000 hectares of forest burns in uncontrolled fires, which is an area larger than the accumulated deforestation since 2001.
2016	Municipality launches Green Flame project	A project for the recovery of forests and permanent preservation areas degraded by the fires suffered by the municipality in the second half of 2015 and early 2016.	The Green Flame Project also aimed to define actions to guide producers to regularize the properties affected by fire.
2016	Re-pact	Re-actuation for sustainable development, fight against illegal deforestation and forest degradation, underwritten by the public authorities with the civil society of the Municipality of Paragominas.	Repacto was a requirement of the state VMP, although not very effective in Paragominas.
2016	Paulinho wins second mayor election	This time against Bosquinho.
2019	Creation of the Paragominas Intelligence and Territorial Development Plan	Through the Municipal Decree 316. The plan foresees a municipal policy of land use reorganization, aiming at reconnecting the forest matrix and increasing forest ecosystem services on all rural properties
2019	Paragominas becomes a Verified Source Area	Through a memorandum of understanding signed with the IDH
2019	Decentralisation of CAR validation	In 2019 SEMAS/PA decentralized to the Municipality of Paragominas the validation of the CAR. This measure is strategic for the development of the municipality, as it will allow the development of sustainable development public policies using a reliable and definitive basis.

## Sheet: TimelineSFX
Year	Event	Description	Comments
1985	Initial demarcation of Apyterewa	Funai demarcates Apyterewa with about 266,800 hectares.
1991	Increasing the demarcated territory of Apyterewa	FUNAI increases the demarcated area of Apyterewa to 980,000 hectares which will include thousands of families that inhabited this area.	Some of these families will formally enter the PA San Francisco created in 1993.
1992	STTR	Workers of the social movement take over the union created in Altamira in 1979;	STTR was taken by pelegos until then;
1992	Creation of CAPPRU	Cappru was created on the initiative of three family farmers' associations and with the support of the Catholic Church and Father Danilo.	Initially targeting white? Farming? white farmers? it will evolve into cocoa and gives rise to CAMPPAX.
1993	Creation of the PA San Francisco	The Cappru was created on the initiative of three family farmers' associations and with the support of the Catholic Church and Father Danilo.	An agreement between MPF, FUNAI and INCRA in 2011 decides to resettle the families in a new settlement (PA Belauto) created in the following year (2012).
1995	Creation of PA Tancredo Neves	With about 17 thousand hectares and 400 families
1995	Creation of the PA Colónia São José do Xingu	With about 40 thousand hectares and more than 800 families
1996	CEPLAC opens office	CEPLAC's municipal activities begin;	The office is within the Secretariat of Agriculture.
1996	Creation of the Southwest PA	With about 30 thousand hectares and more than 500 families
1998	Creation of PA Lindoeste	With about 12 thousand hectares and more than 100 families
1999	Creation of the PA São Sebastião do Xingu	With about 11 thousand hectares and more than 250 families
2000	Creation of the PA Rio Pará	With about 4 thousand hectares and more than 160 families
2000	Creation of the PA Grey River	With about 6 thousand hectares and more than 100 families
2000	Creation of the PA Rio Negro	With about 4 thousand hectares and about 75 families
2000	Creation of PA Arapari	With about 14 thousand hectares and about 150 families
2001	Green CPT and Green land projects	Projects target family agriculture, which was promoted by the Research and Technological Exchange Group (GRET).	These projects form embryo of future projects targeting family agriculture. No reports have been found yet.
2001	Creation of the Rural Family Home (CFR)	Creation of the Casa Familiar Rural (CFR) of São Félix do Xingu.	Encouraged by the CPT Verde and Terra Verde projects
2002	FUNAI and MPF agreement reduces Apyterewa area	The area demarcated in 1991 is reduced to 773,600 hectares (which will be approved in 2007);	Yet it includes many non-indigenous people in the territory including the PA San Francisco;
2002	Comissioning of study to support the creation of the Mosaic of Terra do Meio UCs	Hired by the MMA and implemented by ISA, IPAM, FVPP and CPT
2004	Creation of the Antares PA	With about 7 thousand hectares and about 90 families
2004	Creation of ADAFAX	ADAFAX is a technical assistance entity targeting family farmers.	Fruit of the articulation of Cappru, CPT and CFR of São Félix.
2004	Denimar Rodrigues elected mayor	Denimar wins the elections against Minervina and thus leaves the position of elected state representative in 2002.	Takes office in early 2005.
2005	Creation of PA Samauma II	With about 5 thousand hectares and about 90 families
2005	Creation of PA Santiago	With about 5 thousand hectares and about 90 families
2005	Creation of the Western PA	With about 3 thousand hectares and about 50 families
2005	Creation of PA Centro dos Maranhenses	With about 2 thousand hectares and about 35 families
2005	Murder of Sister Dorothy	Murdered in Anapu on February 12 becomes one of the symbols of the Brazilian socio-environmental movement;	This crime accelerates the formalization of the UCs 5 days later on February 17;
2005	Creation of the Serra do Pardo National Park	Created by Dec s/nº February 17, 2005 with a total size of 445,413.45 hectares, within the National System of Nature Conservation Units (SNUC).	It is an integral protection UC.
2005	Creation of the Terra do Meio Ecological Station	Instituted by Dec s/nº of February 17, 2005 with a total size of 3,373,174.68 hectares, within the National System of Nature Conservation Units (SNUC).	It is an integral protection UC; the aim of the Ecological Stations is to preserve nature and conduct scientific research.
2006	Establishment of the Institute for Community Cooperation and Promotion (ICPC)	Created in 2006 with the objective of aggregating family farmers' associations, to provide technical assistance to and representation of rural communities;	So far only found the reference in the literature. It is probably not active today.
2006	Creation of the APA Triumph of the Xingu	Created by State Decree No. 2,612/2006 and its Managing Council was established by Ordinance No. 583/2011 - GAB/Sema /2011. It has around 1,700,000 hectares. It is a conservation unit of sustainable use where there is private land and the 80/20 forest cover rule applies.	The Managing Council is composed of 32 members (16 from civil society and 16 from (governmental) entities), and 10 sectors of the APA are represented.
2006	Creation of the PA Colonia Murad	With about 3,000 hectares and about 10 families
2006	Creation of the PA Pombal	With about 120 thousand hectares and about 450 families.	PA Pombal will remain within the APA Triumph of the Xingu (state) which was created at the same time (by different entities that do not communicate) which has become a huge problem.
2007	FUNAI and TNC Agreement	FUNAI and TNC sign a Technical Cooperation Agreement to strengthen the implementation of public policies in Tis, which includes Apyterewa as of 2011.	It will result in the elaboration of the Territorial and Environmental Management Plan (PGTA) framed in the PNGATI. The plan will come into operation in 2016;
2007	Creation of TI Apyterewa	Creation of the indigenous territory of the Parakanã people. IT? TI? homologated covers 773470 hectares.
2007	Creation of the AAÇÕES	Created in 2007 from a split of the Institute for Community Cooperation and Promotion (ICPC), it aggregates some existing associations in the municipality, mainly in some settlements;	It has been much criticized by some farmers for being supported by input supply companies;
2007	Creation of the Barra Mansa PA	With about 18 thousand hectares and about 100 families
2007	Creation of the List of Priority Municipalities in the Amazon	Decree 6.321/2007 published on December 21, 2007 provides for actions related to the prevention, monitoring and control of deforestation in the Amazon biome, including the creation of the list of priority municipalities	The list has become one of the main triggers of change in the region.
2008	Inclusion of SFX on the list of priority municipalities	In January, a few weeks after the decree, SFX is included on the list of priority municipalities where it remains until today.
2008	Operation Pirate Ox	IBAMA and ICMBio's operation at the Terra do Meio Ecological Station resulted in the seizure of 3,000 head of cattle and the removal by farmers of over 30,000. It began in May and ended in November.	It was a remarkable moment and the first time that the operations affected the farmers' finances.
2008	REDD+ viability study	A study contracted by TNC and led by Jan Borner defines two priority areas for REDD+ pilot implementation. The study comes out in October.	In Northwest Mato Grosso (which will give rise to the Cotriguaçu project with the ICV and ONF) and the other in Southeast Para (which will give rise to the SFX project led by TNC).
2008	António Levino elected mayor	António Levino wins a lively election against the acting prefect Denimar.	Levino took office in January of the following year and it is during his term that most things happened (2009-2012). Luiz Alberto Araújo will be his Secretary of the Environment (later Secretary in Altamira and assassinated while in office).
2009	Start of the Forest Frontiers Project	Led by IEB, the project operates in 5 municipalities in Amazonas and Pará, having started activities in March 2009. It brings together partners e.g. GRET, IMAZON and ADAFAX in a budget of more than 3 million euros financed mainly by the EU; it ends in 2012.
2009	First meeting to exit the list	The first meeting brought together the main institutions (SPR, City Hall, MPF, MMA, TNC, Embrapa) took place on 9 April.	The population reacted very badly to this event, 400 people in the pavilion and another 200 outside listening through a sound system. It became an assembly of criticism of the environmentalists with big, small, Indians, CFR people, etc.
2009	Slaughterhouses Embargo	On 1 May the MPF embargoes the slaughterhouses for buying cattle of origin linked to deforestation. 20 actions carried out against 34 reús and requests for 2 billion reais damages. 69 companies told not to buy meat linked to deforestation.	An agreement between MPF, FUNAI and INCRA in 2011 decides to resettle the families in a new settlement (PA Belauto) created in the following year (2012).
2009	Second meeting to exit the list	Still in May there is a second meeting gathering local actors and stern entities to discuss the situation of the municipality and find solutions.	This time the meeting was calmer and more focused. The municipality's institutions, namely SPR, begin to agree to adhere to an environmental agenda. Closely related to the embargo on refrigeration companies.
2009	Meat TAC signed between the Federal Public Ministry (MPF) and the largest slaughterhouses	The first TAC is signed in June by Bertin. In July, the other main refrigeration companies including JBS, Mafrig and Minerva sign the TAC. An agreement is also signed with FAEPA in November	It implies not buying from areas on IBAMA's embargo list, not being in an area deforested after 2008, having UC and IT overlapping, nor being on the slave labor list. The first step would be to join the CAR.
2009	Legal is to be Green project	Technical Cooperation Agreement, signed in July 2009 between Sema-PA, São Félix do Xingu City Hall, TNC, SPR and the Frigol Group's refrigeration company, for the CAR and environmental regularization of rural properties;	This was the first TNC project that was later framed under an umbrella program called the Sustainable Landscapes Program. Funded by the Vale Fund and USAID with about 3 to 4 million dollars.
2009	Greenbow Mutirão	Arco Verde do Programa Terra Legal do MDA arrives in São Félix do Xingu. Aimed at promoting land regularization.
2009	Beef Moratoria	In October, the main refigeration companies sign the so called Public Commitment of Livestockwith Greenpeace in which they commit themselves not to buy cattle from deforested areas. It includes JBS/Bertin, Marfrig and Minerva.	In 2017 Greenpeace abandons the moratorium, accusing the refrigeration companies of irregularities and non-compliance.
2009	Xingu Sustainable Environment Project begins	Led by IEB with ADAFAX, MMA and Imaflora as partners. Financed by the Vale Fund. Ended in 2014.	The project supports the Rural Family Home, family agriculture in general, youth training, courses, workshops, etc. It has probably become the most important project for family agriculture.
2009	Creation of the Municipal Council for the Environment (COMAM)	Created by law 385 of June 3.
2009	Creation of SINTRAF	Union established by the Federation of Family Agriculture Workers (Fetraf).	Formed by a group diverging from the CONTAG and FETAGRI line that dominates the STTRs. In the municipality it consolidates the split between family farmers;
2010	Agreement on technical cooperation between TNC, SEMAS (State), municipal government and Rural Producers Union)	Signed on June 23, 2010 to regularize rural properties.	It is part of a project called "Environmental Adequacy of Rural Property: Control of Deforestation and Conservation of the Biodiversity of the Legal Amazon" with resources from BNDES/FA.
2010	Commitment signed with the MPF	On December 9, 2010. São Félix do Xingu City Hall, before the MPF, a Term of Commitment was signed with the State of Pará, Federation of Agriculture of the State of Pará (Faepa) and Ibama.	It aimed to extend environmental licensing, maintain controlled deforestation at 40 km² per year, have 80% of the territory registered with Rural Environmental Registration (CAR) and celebrate a pact for the control of deforestation together with producer organizations and social organizations in the municipality.
2010	Decree establishing PDRS Xingu	The Fund gathers public and Norte Energia money and finances projects of local organizations.	Created to offset the impacts of the paving of the Transamazonica highway and the construction of the Belo Monte Plant that affected a number of municipalities including São Félix.
2010	Start of the Virada Verde project	TNC approves Amazon Fund project to implement CAR in 12 municipalities, including SFX. The total project is worth about 20 million reais, of which at least 5 are used in SFX.
2011	Municipal Pact for the reduction of deforestation in São Félix do Xingu Project	The main project in São Félix do Xingu runs from 2011 and 2014. It is coordinated by the Ministry of Environment, within the Secretariat of Extraction and Sustainable Rural Development (SEDR), in partnership with FAO. It also has the support of GIZ, with the Pará State Environmental Secretariat, Municipal Environmental Secretariat.	The 4 main axes of the project are (1) articulation for the signing of the municipal pact for the end of deforestation, (2) implementation of the CAR, (3) creation of the Municipal Plan for the Recovery of Degraded Areas and (4) improving the institutional capacitation of local actors. The project is promoted by the Institutional Articulation Committee (CAIP), which changed its name to the Post-C…
2011	Signing of the Municipal Pact for an end to illegal deforestation	The Municipal Pact for ending illegal deforestation, containing 14 clauses, was signed by 41 representatives of municipal, state and federal public institutions, civil society organizations and NGOs on August 26, 2011.	The pact begins with a public hearing held in May 2011; a commission was created (Municipal Commission of the Pact for the End of Illegal Deforestation), which organized 10 hearings
2011	REDD+ Readiness in Brazil (RRB) Project	Led by TNC and funded by USAID, it aimed to work on the feasibility of implementing REDD+ projects in Pará and Mato Grosso.	It will lead to the NORAD-funded REDD+ project in 2013; it also comes under umbrella of the Sustainable Landscape Program.
2011	SFX reaches 80% of surface area registered in the CAR	One of the main criteria required to get off the blacklist is reached
2012	Terra do Meio Project	The project runs for 3 years in 11 conservation units in the region called Terra do Meio, which also includes the São Félix side. Coordinated by the MMA with the support of about 7 million euros from the EU.
2012	Creation of the Advisory Board of the Serra do Pardo National Park	Created in December 2012
2012	Creation of the Belauto PA	With about 25 thousand hectares and about 400 families.	Created to resettle families that were in the San Francisco PA but who in the meantime had remainded within the Apytereua indigenous area. In 2018 a court decision defined the return of the Belauto farm to the previous owners which further increased the problem.
2012	João Kléber elected mayor	Wins the election against Minervina.	It? He? has the support of former Mayor Denimar, who, after the inauguration, became Secretary of the Environment (2013-2016);
2013	Inauguration of the Environmental Observatory	Opened in August.	It is a result of the project Project Xingu Pact and continues its work after the project in the municipal SEMAS;
2013	Walmart commits to zero deforestation	In the Amazon.	The agreement is extended to the entire supply chain in 2016.
2013	Field-to-Table Project	TNC, Marfrig and Walmart establish partnership with 16 ranchers selected by the Rural Producers Union. Later these 16 will be organized in the Rebanho do Xingu Association; this group orignated in previous training, good practices initiatives, and PRADA and aimed at testing models of intensification. It aligned work with Embrapa and BPAs.	It later evolved to ensure monitoring of the entire supply chain and the creation of a brand of meat completely free of deforestation sold by Walmart. It is financed by the Moore Foundation. It also enters the Sustainable Landscapes Program. It is the natural evolution of CAR's previous work that was not enough to stop deforestation.
2013	CAR implementation reaches 83%	83% of the registered area of the municipality is in the CAR.	SFX thus meets one of the criteria to get off the list (80%).
2013	The Forest Cocoa Project begins	This project is a partnership between TNC, CEPLAC and the municipality and has implemented 4 SAFs of cocoa and encouraged 130 producers to grow cocoa trees in degraded area, assuming zero deforestation. Later, CAMPPAX joins. Mondelez and Olam join later too.	It inherits some work from previous projects, related to family farming, namely REDD+ related projects. Initially receives funding from Cargill and then from NORAD.
2014	Creation of the Green Earth Fund	Fund to capture climate resource for the municipality.	The fund launched with much support from TNC. After the first phase of funding according to TNC, it was concluded that it would not be a viable financing model.
2014	Torrinho wins election for SPR	Mayor João Kléber's brother wins the Rural Producers Union election.	The hardest line takes over the Rural Producers Union, which makes it difficult to work in the livestock sector and encourages the creation of the Xingu Herd Association with the moderate sector.
2014	Creation of the Herd of Xingu Association	Creation of the Herd of the Xingu Association bringing the ranchers of the Rural Project to the Table.	It was related to the change of management of SPR, namely the victory of Torrinho and the departure of the group from Laércio. It currently has 26 members.
2014	Design of the Plan for the Recovery of Degraded Areas	The plan is created by a consultancy included in the Pact project.
2014	Inauguration of the Frigol plant	Frigol opens a plant in the municipality.	Located at the entrance of the city of São Félix
2014	Creation of the CAMPPAX	The new cooperative CAMPPAX is created, heir to CAPPRU;	works mainly with cocoa farmers and has strong links with ADAFAX and CPT;
2014	IEB closes its activities in the municipality	End of the work in SFX
2015	Green Earth Fund operates for the first and last time	The fund finances 12 projects for a total of R$ 197,000 but there isno guarantee it will continue
2015	Municipal Decree establishing the Sectoral Plan for Climate Change Mitigation and Adaptation	It will give rise to Plan ABC the following year
2015	Cargill launched its Forest Policy	In September 2015, one year after signing the New York Declaration on Forests (NYDF), Cargill launched its Forest Policy.	It has made its commitment to protect the areas of greatest biodiversity on the planet official and is committed to halving deforestation throughout its agricultural production chain by 2020 and halting it completely by 2030.
2016	Municipal ABC Plan approved	The Municipal ABC Plan includes a Municipal ABC Steering Committee. It is divided into 10 main actions that include indicators, targets, verification mechanisms. It also has an operational plan with a responsible institution, products and targets;	It resulted from the work of about 20 institutions and 50 people. It can be considered the main local development plan, although it is not considered very appropriate by the municipality.
2016	Minervina elected mayor	Minervina wins the elections and João Cléber after two defeats (2004 and 2012).	It takes office in January 2017.
2016	Meat with the Xingu Herd seal on sale at Walmart	Walmart supermarkets in Brasília receive the first batch of meat bearing the label Rebanho do Xingu (Sheep of the Xingu) with a guarantee of zero deforestation throughout the chain (direct and indirect).	It was the first and only time, since it was impossible to make Walmart's demand for quantity viable. No premium was paid, but the gain in productivity (from 0.8 to about 3 heads per hectare) was considered feasible.
2017	Startt of the Value Forests project	Led by IMAFLORA and includes other regions than just SFX. Financed by the Amazon Fund.	The project is still somewhat in line with XAS. It resulted in the creation of a local IMAFLORA office. Several lines of work including marketing, organic production, institutional training...
2018	Former mayor João Kléber is arrested	Arrested in April and accused of administrative improbity and then released in May.	Kléber tries to get elected as a state representative at the end of the year but fails.
2018	Arrest of former mayor Denimar ordered who goes on the run	Accused of management irregularities as head of the Municipal Secretary of the Environment (2013-2016) for allegedly municipalizing environmental fines from producers and later accepting bribes to pardon them
